# Supplementary material
Source: publisher site journal article supplement (https://www.spandidos-publications.com/5416/downloadSupplementary)
Supplement: Supplementary file 1 [file downloadSupplementary]

## Sheet: supplementary Table S1
Table SI: The primers used in this study.
Name	Forward sequence	Reverse sequence
BNP	TGGAAACGTCCGGGTTACAGGA	TCCGGTCCATCTTCCTCCCAAA
ANP	CAGCAAGCAGTGGATTGCTCCT	TCTGCGTTGGACACGGCATTGT
SMOC2	GTCTCCTTGCAAATCTTTTCCG	CCACATTGTCGTTCTTGGGC
PLCE1	GAGCTGCAATCGAAGTCTGG	AAGGCCTTCTGTGAGTCCTC
SERPINA3	GCTCATCAACGACTACGTGAA	CACCATTACCCACTTTTTCTTGC
MYH6	CTGGCCCTTCAACTACAGAA	TGTTCATCTCGATCTGCACG
S100A9	CGGCTTTGACAGAGTGCAAG	CAGGTTAGCCTCGCCATCAG
LYVE1	AGGCTAGGTGGGTTGAAAGC	CCATGGCTTTCAGGGGCTAA
TUBA3E	CGAAGGCATGGAAGAGGGAG	AGGGGAGAACCCACCACAC
TUBA3D	GATTGGTGCCCGACTGGATT	CAGGGGAGAACCCACCACAC
GAPDH	GGAGCGAGATCCCTCCAAAAT	GGCTGTTGTCATACTTCTCATGG
